# Supplementary material
Source: PubMed Central journal article supplement (PMC8023431)
Supplement: NIHMS1681278-supplement-Supplemental_Methods.pdf [file NIHMS1681278-supplement-Supplemental_Methods.pdf]

## 587 SUPPLEMENTAL METHODS

### 588 *Biodistribution of PHA-408 following Intra-articular Injection*

589 Mice (20-25 weeks, n=2-5 group/timepoint) in cohort 4 underwent compressive joint injury  
590 followed by intra-articular injections of either PHA-408 (3 µg/5 µL) or vehicle (5 µL, sterile saline  
591 + 0.1% DMSO) immediately post-joint injury and 48 h post-joint injury. At terminal timepoints (30  
592 min, 2 h, 3 d, 7 d) 1 mL of blood was collected by cardiac puncture and serum was obtained  
593 following centrifugation. Lymph nodes (inguinal and lumbar), knees, and urine were collected at  
594 the time of sacrifice. Lymph nodes were suspended in 500 µL acetonitrile (ACN), and  
595 homogenized (Mini-BeadBeater™, BioSpec, Bartlesville, OK). Knees were flash frozen in liquid  
596 nitrogen, homogenized (BioPulverizer™, BioSpec), and suspended in 2 mL of ACN. Samples  
597 were then vortexed for 2 h and centrifuged to collect clarified ACN. Drug concentration in serum,  
598 urine, lymph nodes, and knee tissue was estimated via LC-MS upon an Agilent 1200 series HPLC  
599 instrument and an Agilent 6410 triple-quadrupole mass spectrometer operated in positive  
600 electrospray ionization mode (collision gas flow rate: 11 L/min, source block temperature: 300°C).  
601 Samples (20 µL) were injected into a C18 column (4.6×100 mm, 3.5 µm, Agilent) at 37°C using a  
602 gradient elution method (Water and ACN mix) at a flow rate of 0.65 mL/min. PHA-408 was  
603 quantified by multiple reaction monitoring (Q1/Q3, 560.246/514.113) with a 51V collision energy.

### 604 *Hindpaw Thermal Sensitivity*

605 Mice were gently scruffed and the plantar side of the tested paw was placed on a hot/cold  
606 plate (50/0°C, BIO-CHP, Bioseb) while the other paw was placed on a room temperature  
607 plexiglass surface at the same height. Mice were held stationary until a clear paw withdrawal  
608 occurred or a 20 or 30 sec threshold was reached on the hot and cold plate respectively. Latency  
609 to withdrawal was recorded, three independent measures were collected for each hindpaw at  
610 each temperature. Animals were allowed a one minute recovery period between consecutive  
611 hindpaw measurements.

612

613 *Longitudinal NF- $\kappa$ B-driven Luminescence and Allodynia Correlation*

614 To test for relationships between NF- $\kappa$ B luminescence and allodynia Pearson correlation  
615 coefficients were calculated. In vivo imaging and 50% withdrawal threshold data were log-  
616 transformed (base 10). All data were then normalized by each animals' individual baseline value,  
617 represented as the difference from baseline, and the area under the curve was calculated in an  
618 early (0 to 7/8 d) study window. Data were then z-scored and the Pearson correlation coefficient  
619 was calculated. This early window was chosen based on observed NF- $\kappa$ B luminescence temporal  
620 dynamics and appropriately accounts for repeated measures taken from the same animal over  
621 time and is more telling of prolonged changes to behavior than correlating changes observed at  
622 any one point in time. Temp and colleagues have tested for similar relationships between pain-  
623 sensitivity measures and endpoint histology<sup>29</sup>.

624 *Joint Laxity Testing*

625 Murine cadavers (male, 9-12 weeks of age, n=10) underwent cyclic compressive loading  
626 of a randomly assigned knee joint to induce knee joint injury. Hindlimbs were then dissected and  
627 scored by three blinded investigators for anterior-posterior laxity (0=naive, 1=increased anterior-  
628 posterior laxity). Summed scores for each joint were calculated and CTRL and INJ joint scores  
629 were compared via a Mann-Whitney test.
